# Supplementary material
Source: Springer Nature journal article supplement (https://www.springermedizin.de/resource/supplementary/12906_2013_1597_MOESM6_ESM.pdf/9522350)

24 hr

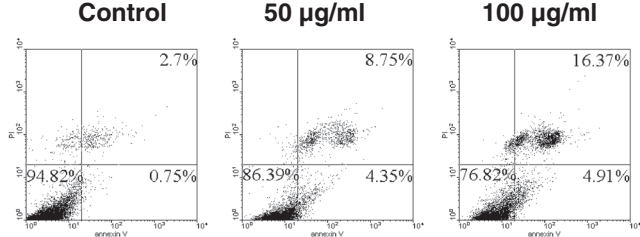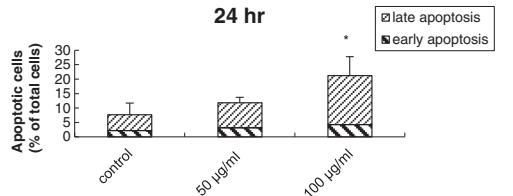

48 hr

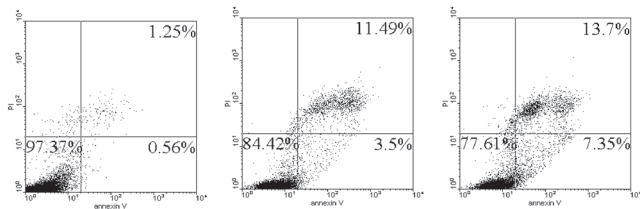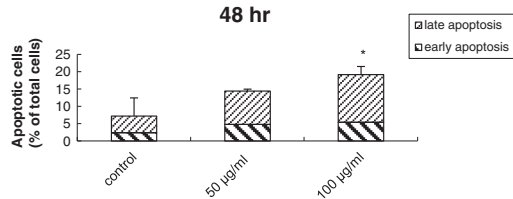

72 hr

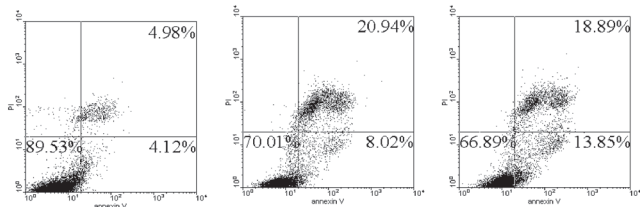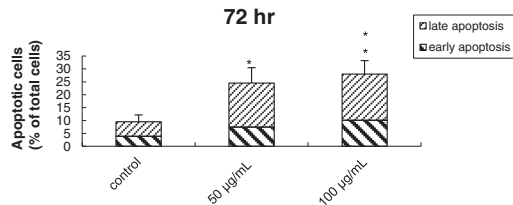

Supplement: MOESM6 [file 9522350]
